# Supplementary material
Source: ML conference proceedings conference paper supplement (https://openaccess.thecvf.com/content/CVPR2023/html/Yu_Efficient_Loss_Function_CVPR_2023_paper.html)
Supplement: Supplementary file 1 [file Yu_Efficient_Loss_Function_CVPR_2023_supplemental.pdf]

**Details on the attack’s failure caused by floating-point underflow errors.** To analyze the reasons for the failure of the attack caused by floating-point underflow errors, we selected  $\mathbb{Z} = \mathbf{z}_y - \max_{i \neq y} \mathbf{z}_i$ , which indicates the success or failure of the attack based on its sign. We compared the change of  $\mathbb{Z}$  for samples attacked by PGD-100 with CE loss but failed, and PGD-100 with MIFPE loss but succeeded. Figure 1 shows that for samples attacked with CE loss,  $\mathbb{Z}$  remains constant throughout the attack. In contrast, for samples attacked with MIFPE loss,  $\mathbb{Z}$  smoothly drops below 0 after approaching 0. This phenomenon reveals that floating-point rounding errors cause the calculated gradient to be 0, resulting in a null perturbation added to the sample, which keeps the example constant throughout the iteration and causes the attack to fail.

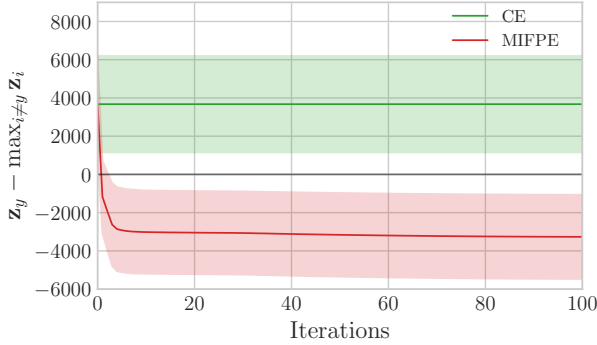

Figure 1. The changing process of the value of  $\mathbb{Z} = \mathbf{z}_y - \max_{i \neq y} \mathbf{z}_i$  with the number of iterations during the attack on the CIFAR10 dataset using the model from Neural level sets [1] and single-precision arithmetic. The horizontal axes show the number of iterations used so far, and the vertical axes show the value of  $\mathbb{Z}$ .

**Indirectly controls the values of  $\mathbf{z}_{\pi_1} - \mathbf{z}_{\pi_2}$  can also reduce the impact of floating point errors.** We know that MIFPE controls  $\mathbf{z}_{\pi_1} - \mathbf{z}_{\pi_2}$ , but this is just one of the combinations in  $\mathbf{z}_{\pi_1} - \mathbf{z}_{\pi_i}, i \in \{2, 3, \dots, K\}$ . Therefore, we asked what would happen if we used  $i \in \{3, \dots, K\}$  instead of  $i = 2$  in MIFPE. To answer this, we designed an experiment where we tested the model’s robustness using different combinations of  $\mathbf{z}_{\pi_1} - \mathbf{z}_{\pi_i}, i \in \{2, 3, \dots, K\}$  in MIFPE. Figure 2 shows that all combinations reduce the overestimation of model robustness caused by floating-point errors to varying degrees, but the optimal result is achieved for  $i = 2$ . This is because controlling  $\mathbf{z}_{\pi_1} - \mathbf{z}_{\pi_i}, i \in \{3, \dots, K\}$  values also indirectly controls the values of  $\mathbf{z}_{\pi_1} - \mathbf{z}_{\pi_2}$ .

**Floating-point rounding errors account for the majority of overestimation of robustness.** To understand the distribution of  $\Delta = \mathbf{z}_{\pi_1} - \mathbf{z}_{\pi_2}$  on models with floating-point errors leading to overestimation of robustness and to analyze whether floating-point rounding errors or floating-point

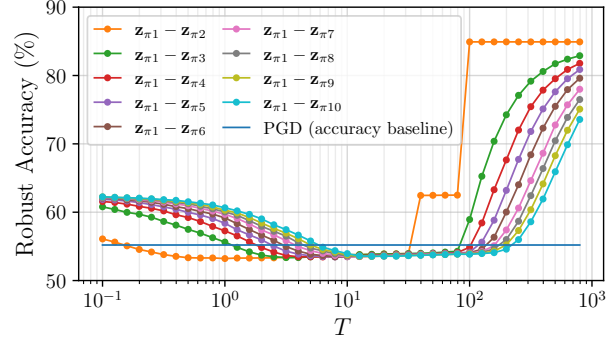

Figure 2. We assess model robustness among different combination for  $\mathbf{z}_{\pi_1} - \mathbf{z}_{\pi_i}, (i \in 2, 3, \dots, K)$  using 100 iterations of FT-PGD with CE loss on the CIFAR-10 dataset under half-precision floating-point arithmetic. The model is obtained from [15].

downflow errors account for the majority of floating-point errors, we plotted the distribution of  $\Delta$  on twelve models from [1–5, 8–13, 15], respectively. To further understand how the  $T$  in the MIFPE loss function impacts the attack effectiveness, we varied  $T$  from  $10^{-1}$  to  $10^3$  on each model. Figure 3 illustrates the  $\Delta = \mathbf{z}_{\pi_1} - \mathbf{z}_{\pi_2}$  distribution and robust accuracy with different  $T$  for the models.

We found that the range of  $\Delta$  varies dramatically for the different defence models. Among them, none of the  $\Delta$  in Figure 3 [(a)-(k)] exceeds 20, which is much smaller than the  $\lambda \approx 103.28$  for the single-precision floating-point arithmetic, and the floating-point rounding errors are the main reason for overestimating model robustness under single-precision floating-point arithmetic. While only in Figure 3 (l) most of the  $\Delta$  exceeds the  $\lambda \approx 103.28$  for the single-precision floating-point arithmetic, the floating-point underflow errors are the main reason for overestimating the model’s robustness under single-precision floating-point arithmetic. In summary, Floating-point rounding errors are the main reason for most of the overestimation of model robustness caused by floating-point errors. In contrast, the overestimation of model robustness caused by floating-point underflow errors is severe but rarely occurs. We found that the best  $T$  values for all models are usually close to 1. So we used the factor  $T = 1$  in all our experiments.

**When floating-point errors are not the primary cause of overestimation.** We evaluated the performance of MIFPE on rare models that suffer from overestimation due to a typical gradient masking problem that the flat loss surface in the input space, rather than floating-point errors. The results, presented in Figure Figure 4, demonstrate that MIFPE can significantly reduce the problem of overestimation of model robustness by adjusting the  $T$  value, even when floating-point errors are not the primary cause of overestimation.

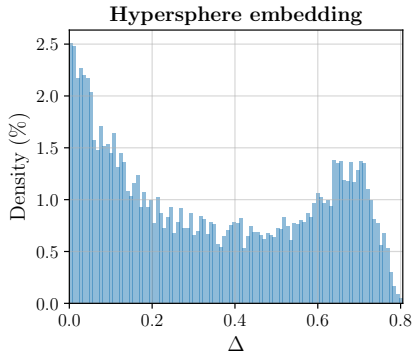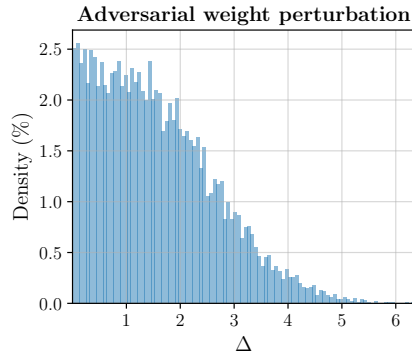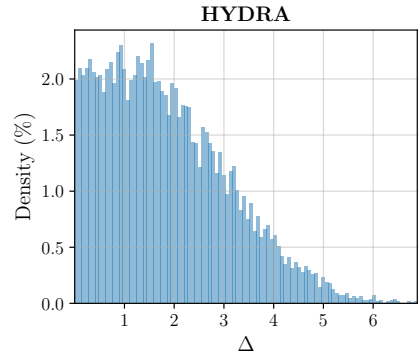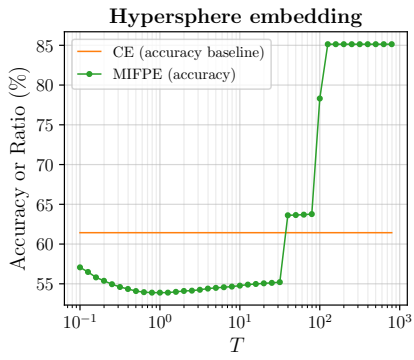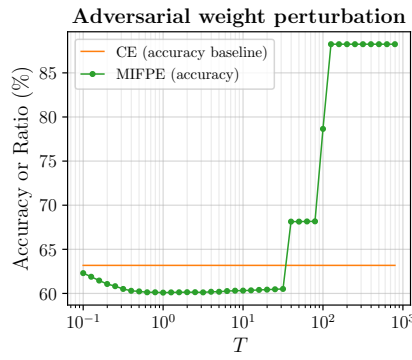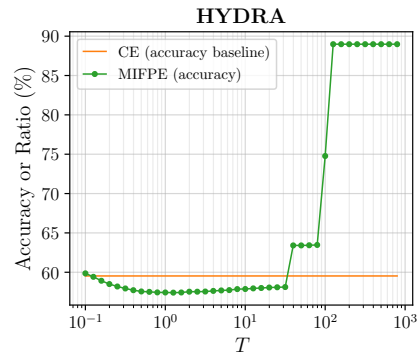

(a) [8]

(b) [13]

(c) [10]

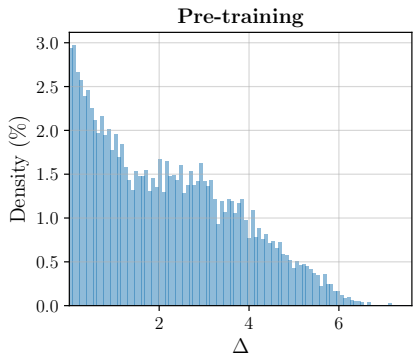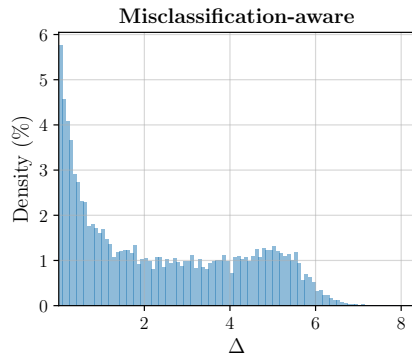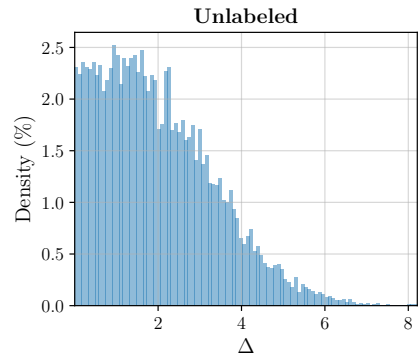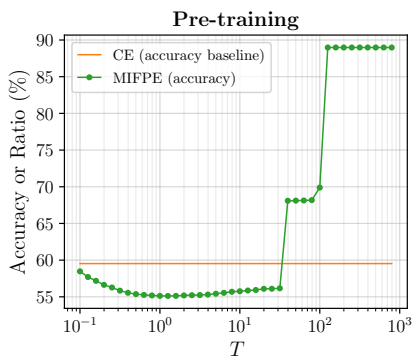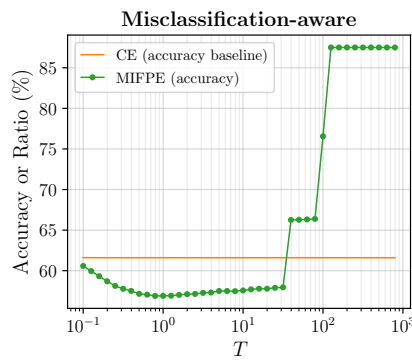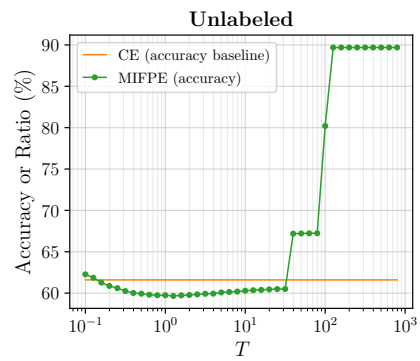

(d) [5]

(e) [11]

(f) [2]

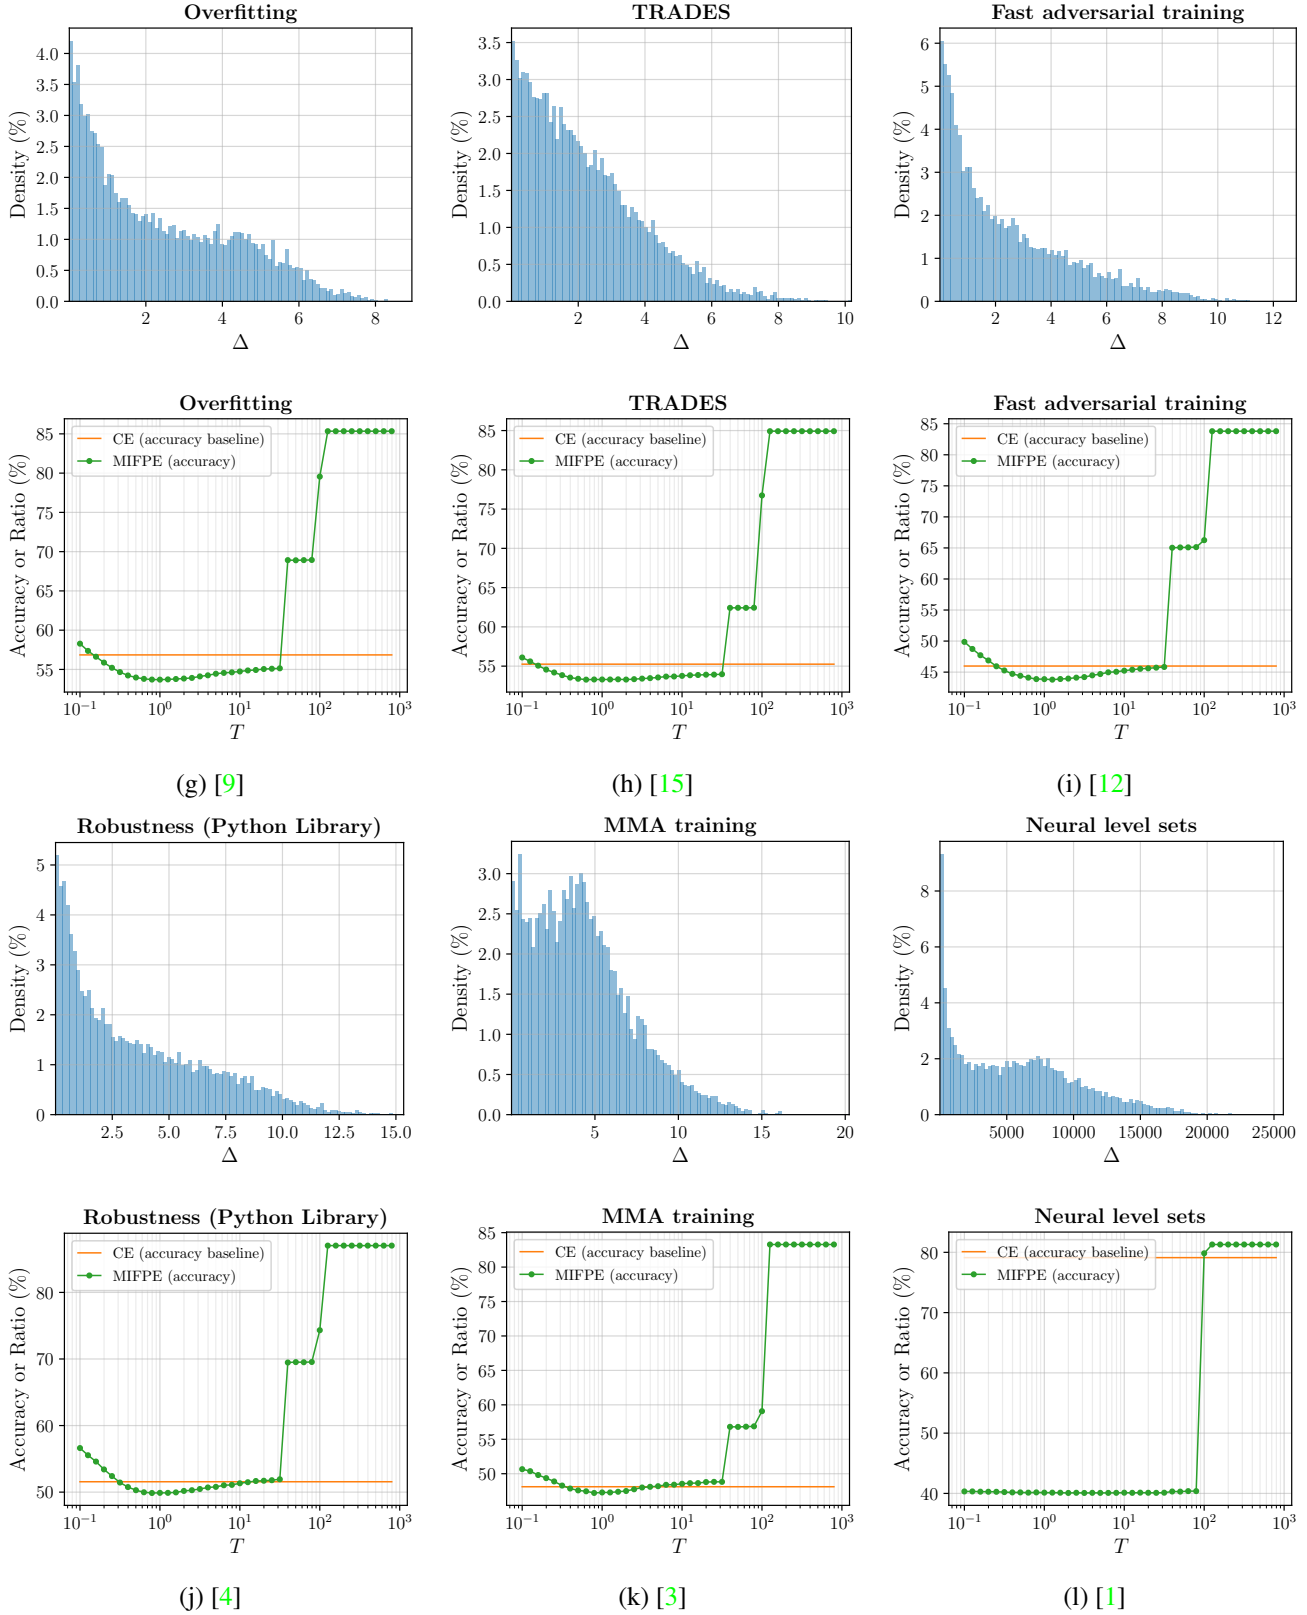

Figure 3. The  $\Delta = \mathbf{z}_{\pi_1} - \mathbf{z}_{\pi_2}$  distribution (top) and robust accuracy with different  $T$  (bottom) for the models of [1–5, 8–13, 15]. The distribution is averaged over 100 bins. The model’s robustness is tested under single-precision floating-point arithmetic using PGD with 100 iterations and the CE loss and MIFPE loss, respectively.

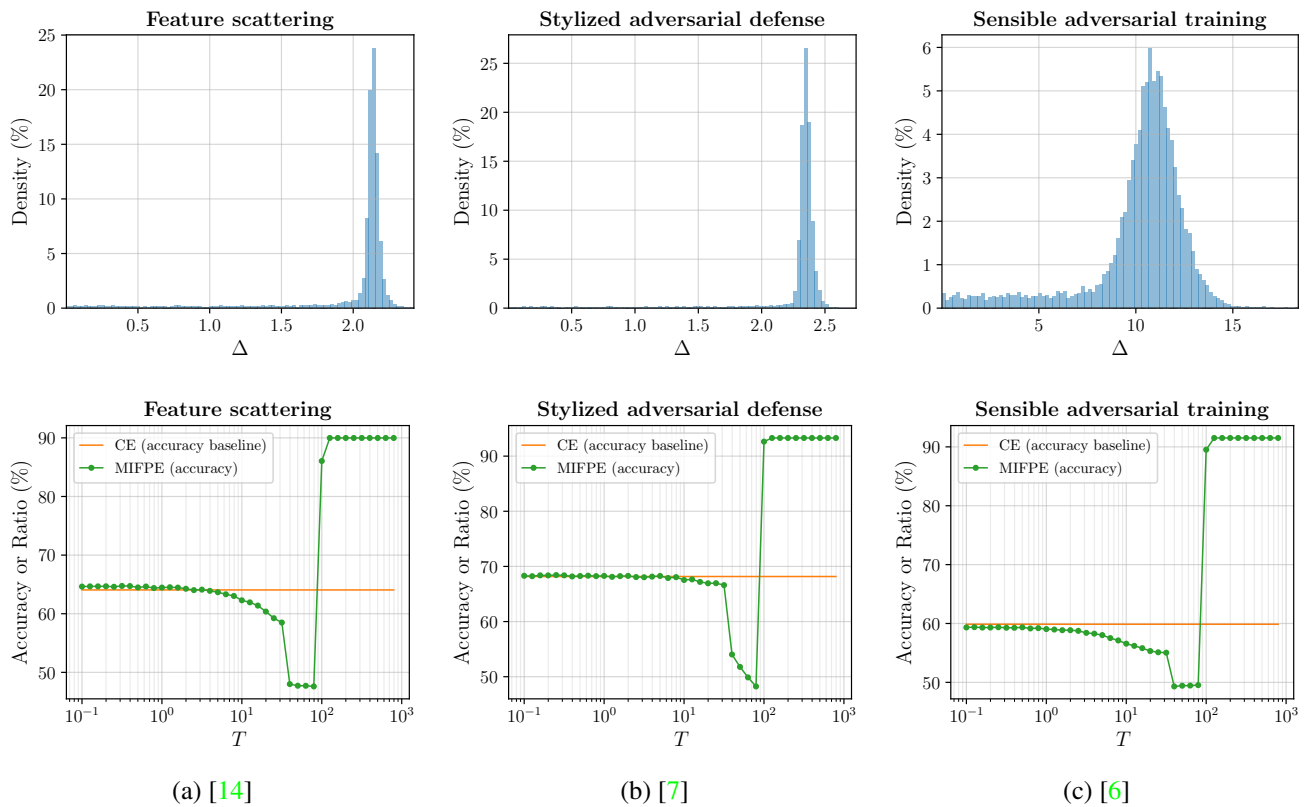

Figure 4. The  $\Delta = \mathbf{z}_{\pi_1} - \mathbf{z}_{\pi_2}$  distribution (top) and robust accuracy with different  $T$ (bottom) for the models of [6, 7, 14]. The distribution is averaged over 100 bins. The model’s robustness is tested under single-precision floating-point arithmetic using PGD with 100 iterations and the CE loss and MIFPE loss, respectively.

## References

- [1] Matan Atzmon, Niv Haim, Lior Yariv, Ofer Israelov, Haggai Maron, and Yaron Lipman. Controlling neural level sets. In *Advances in Neural Information Processing Systems*, pages 2032–2041, 2019. 1, 3
- [2] Yair Carmon, Aditi Raghunathan, Ludwig Schmidt, John C Duchi, and Percy S Liang. Unlabeled data improves adversarial robustness. In *Advances in Neural Information Processing Systems*, volume 32, pages 11192–11203, 2019. 1, 2, 3
- [3] Gavin Weiguang Ding, Yash Sharma, Kry Yik Chau Lui, and Ruitong Huang. Mma training: Direct input space margin maximization through adversarial training. In *International Conference on Learning Representations*, 2020. 1, 3
- [4] Logan Engstrom, Andrew Ilyas, Hadi Salman, Shibani Santurkar, and Dimitris Tsipras. Robustness (python library), 2019. Available at: <https://github.com/MadryLab/robustness>. 1, 3
- [5] Dan Hendrycks, Kimin Lee, and Mantas Mazeika. Using pre-training can improve model robustness and uncertainty. In *International Conference on Machine Learning*, pages 2712–2721. PMLR, 2019. 1, 2, 3
- [6] Jungeum Kim and Xiao Wang. Sensible adversarial learning. *OpenReview*, 2020. Available at: [https://openreview.net/forum?id=rJlf\\_RVKwr](https://openreview.net/forum?id=rJlf_RVKwr). 4
- [7] Muzammal Naseer, Salman Khan, Munawar Hayat, Fahad Shahbaz Khan, and Fatih Porikli. Stylized adversarial defense. *arXiv 2007.14672*, 2020. 4
- [8] Tianyu Pang, Xiao Yang, Yinpeng Dong, Kun Xu, Hang Su, and Jun Zhu. Boosting adversarial training with hypersphere embedding. In *NeurIPS*, 2020. 1, 2, 3
- [9] Leslie Rice, Eric Wong, and J. Zico Kolter. Overfitting in adversarially robust deep learning. In *ICML*, 2020. 1, 3
- [10] Vikash Sehwal, Shiqi Wang, Prateek Mittal, and Suman Jana. Hydra: Pruning adversarially robust neural networks. *arXiv preprint arXiv:2002.10509*, 2020. 1, 2, 3
- [11] Yisen Wang, Difan Zou, Jinfeng Yi, James Bailey, Xingjun Ma, and Quanquan Gu. Improving adversarial robustness requires revisiting misclassified examples. In *International Conference on Learning Representations*, 2020. 1, 2, 3
- [12] Eric Wong, Leslie Rice, and J. Zico Kolter. Fast is better than free: Revisiting adversarial training. In *International Conference on Learning Representations*, 2020. 1, 3
- [13] Boxi Wu, Jinghui Chen, Deng Cai, Xiaofei He, and Quanquan Gu. Do wider neural networks really help adversarial robustness? In *Thirty-Fifth Conference on Neural Information Processing Systems*, 2021. 1, 2, 3
- [14] Haichao Zhang and Jianyu Wang. Defense against adversarial attacks using feature scattering-based adversarial training. In *Advances in Neural Information Processing Systems*, volume 32, pages 1831–1841, 2019. 4
- [15] Hongyang Zhang, Yaodong Yu, Jiantao Jiao, Eric Xing, Laurent El Ghaoui, and Michael Jordan. Theoretically principled trade-off between robustness and accuracy. In *ICML*, 2019. 1, 3
